# Supplementary material
Source: PubMed Central journal article supplement (PMC6279145)

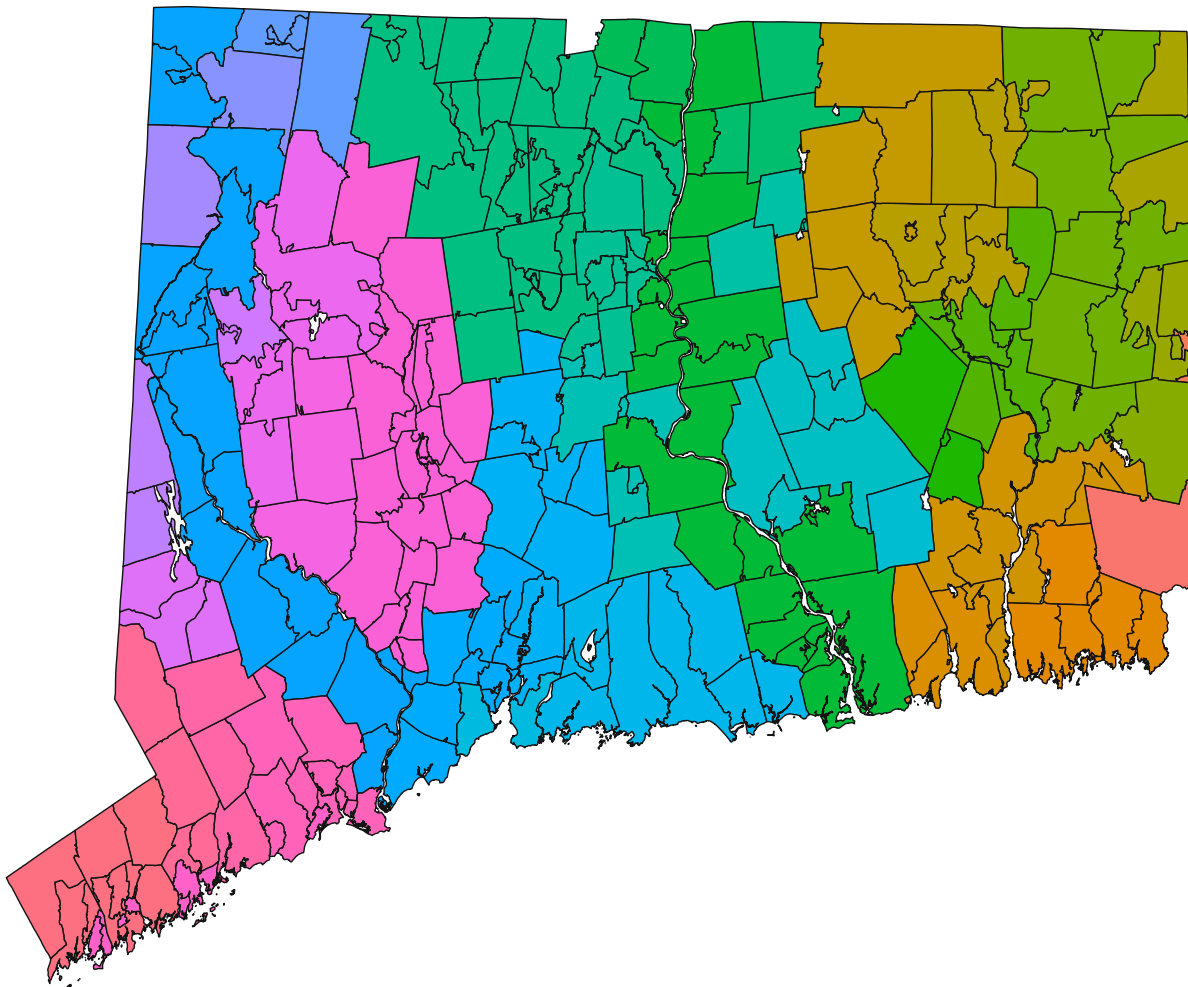

Regional Watershed Basin

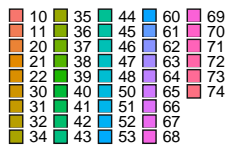

Supplement: jix531_suppl_cassell_figures1.pdf [file jix531_suppl_cassell_figures1.pdf]

A

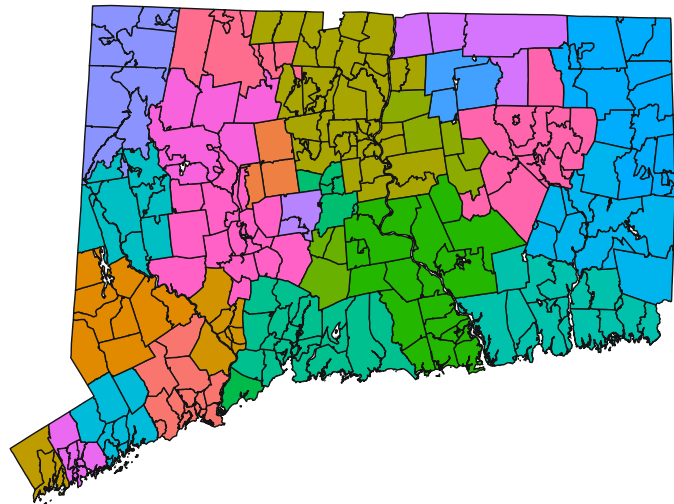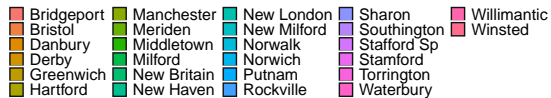

B

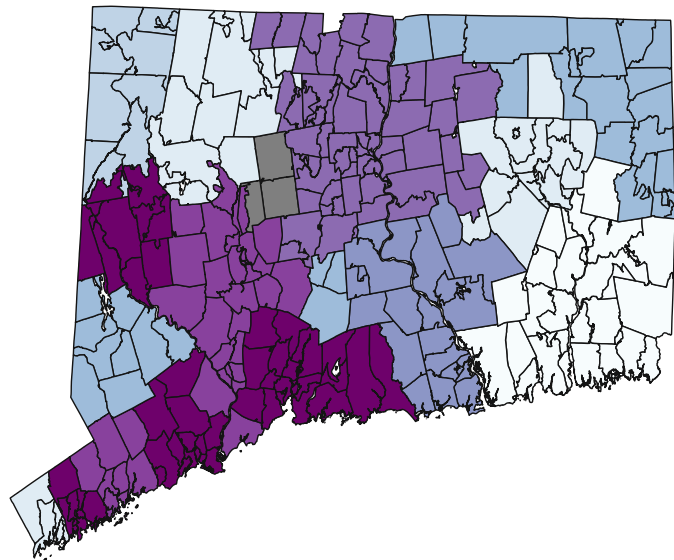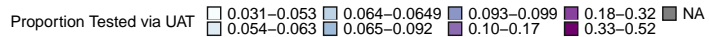

Supplement: jix531_suppl_cassell_figures2.pdf [file jix531_suppl_cassell_figures2.pdf]

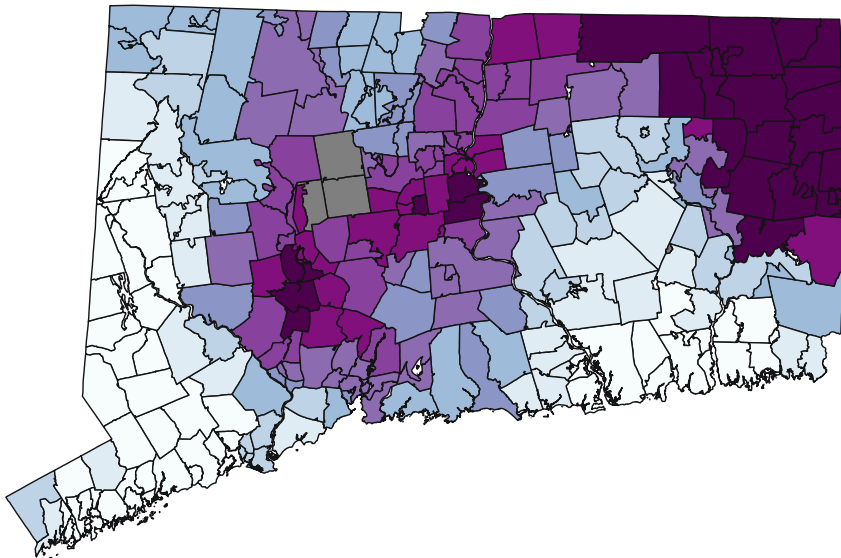

Rate Ratio

|           |           |           |           |           |
|-----------|-----------|-----------|-----------|-----------|
| 0.50-0.73 | 0.81-0.88 | 0.95-0.98 | 1.09-1.20 | 1.27-3.01 |
| 0.74-0.80 | 0.89-0.94 | 0.99-1.08 | 1.21-1.26 | NA        |

Supplement: jix531_suppl_cassell_figures3.pdf [file jix531_suppl_cassell_figures3.pdf]

A

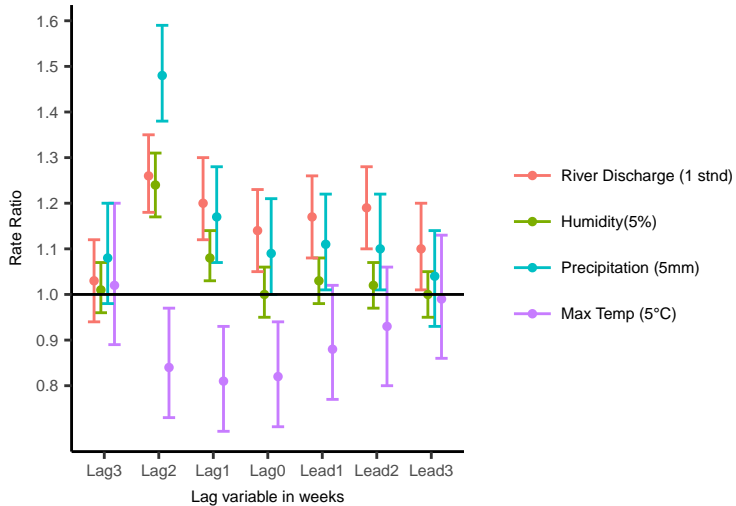

B

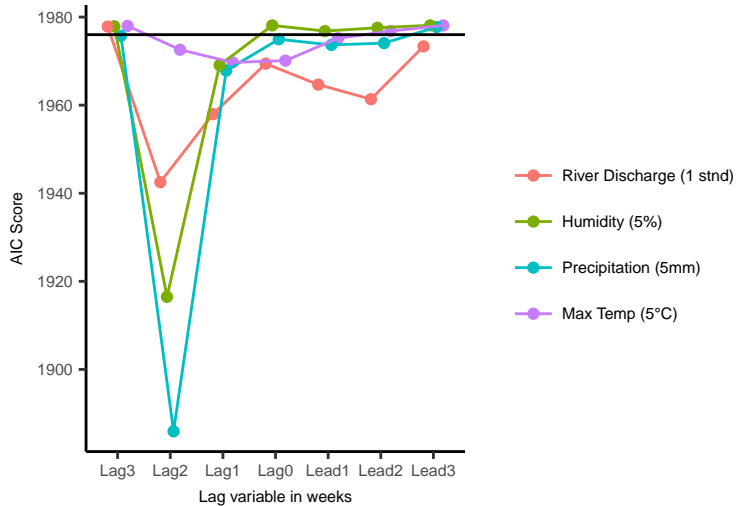

Supplement: jix531_suppl_cassell_figures4.pdf [file jix531_suppl_cassell_figures4.pdf]

A

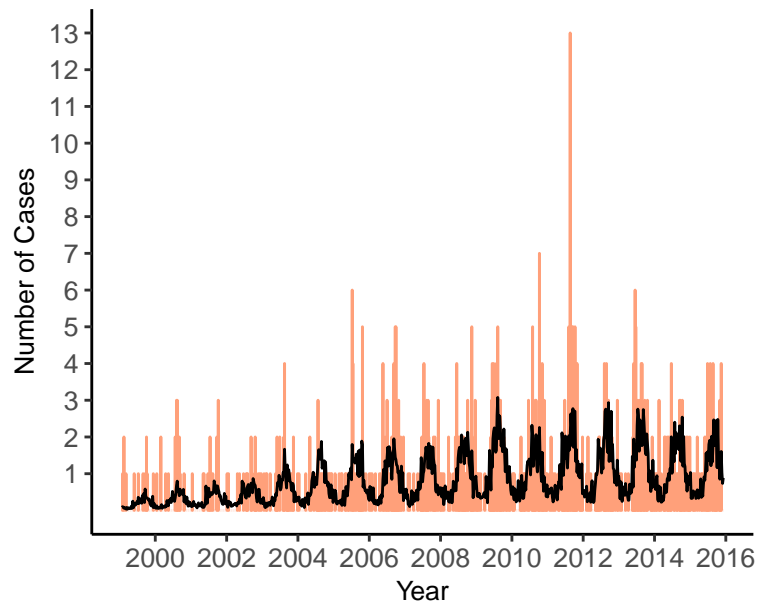

Observed Predicted

A

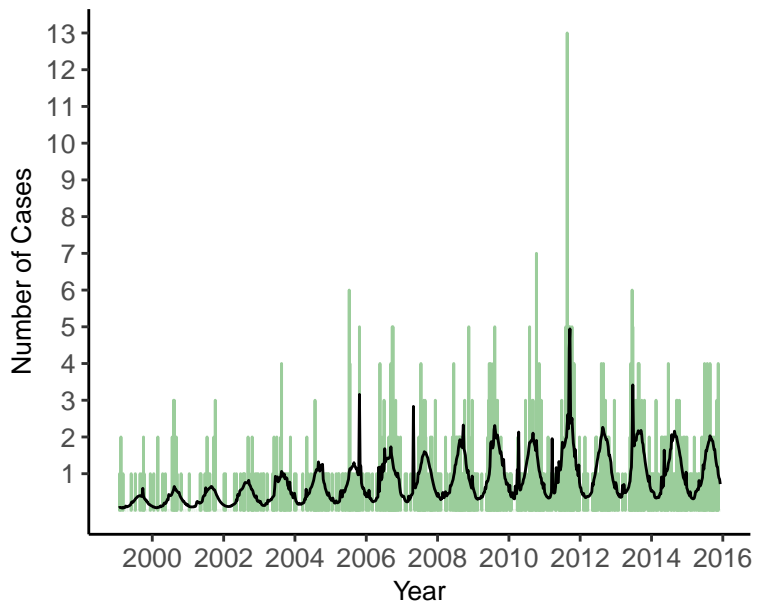

Observed Predicted

Supplement: jix531_suppl_cassell_figures5.pdf [file jix531_suppl_cassell_figures5.pdf]
